# Supplementary material for: Crystal structure of human cytoplasmic tRNAHis-specific 5′-monomethylphosphate capping enzyme
Source: PubMed Central journal article supplement — Nucleic Acids Res. 2020 Jan 10;48(3):1572–82. doi: 10.1093/nar/gkz1216 (PMC7026607; doi:10.1093/nar/gkz1216), 2020-01-10
Supplement: gkz1216_supplemental_file.pdf [file gkz1216_supplemental_file.pdf]

# SUPPLEMENTARY DATA

## Figure S1

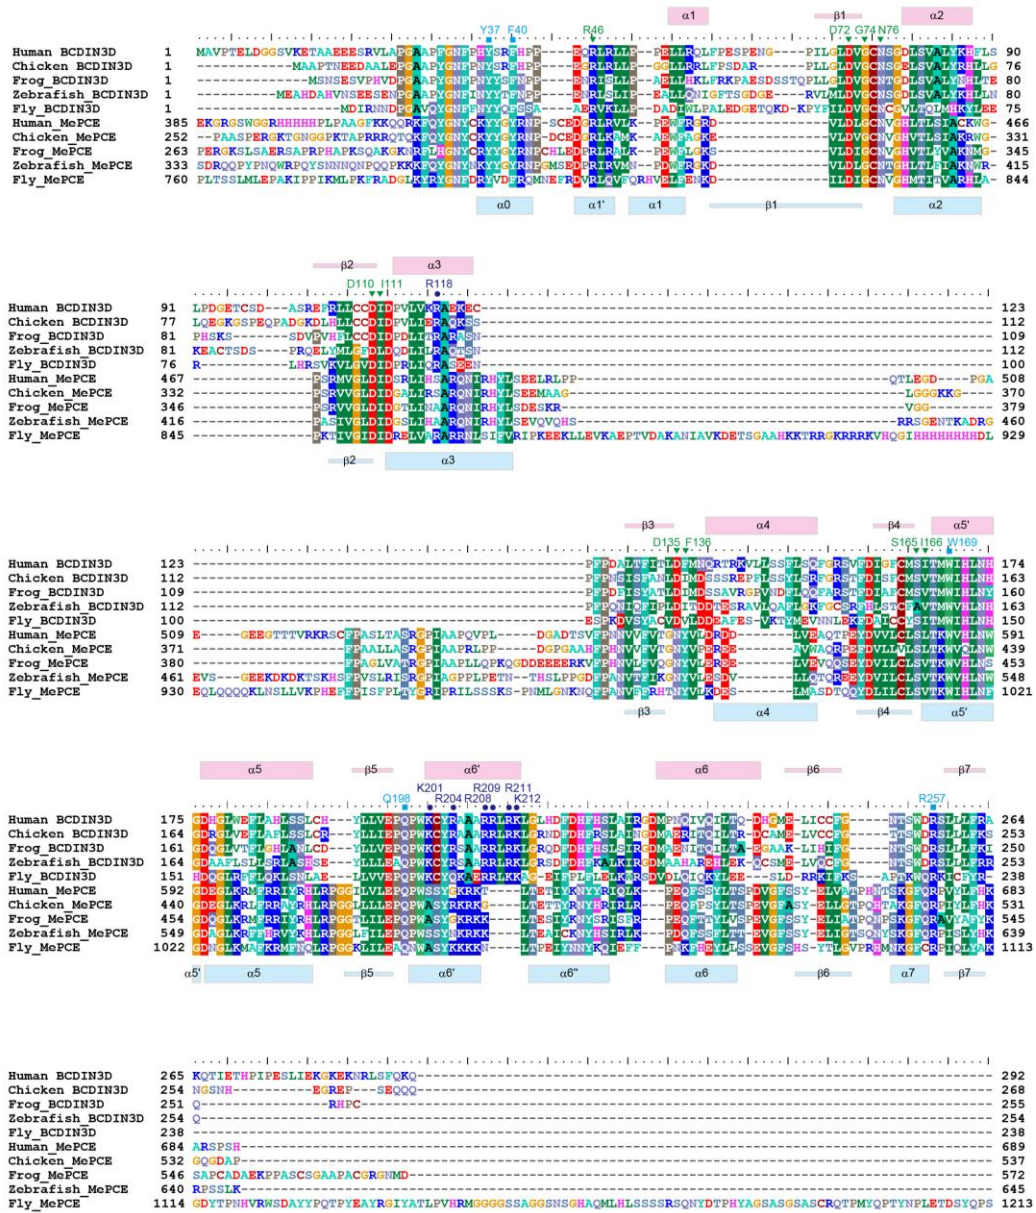

**Figure S2**

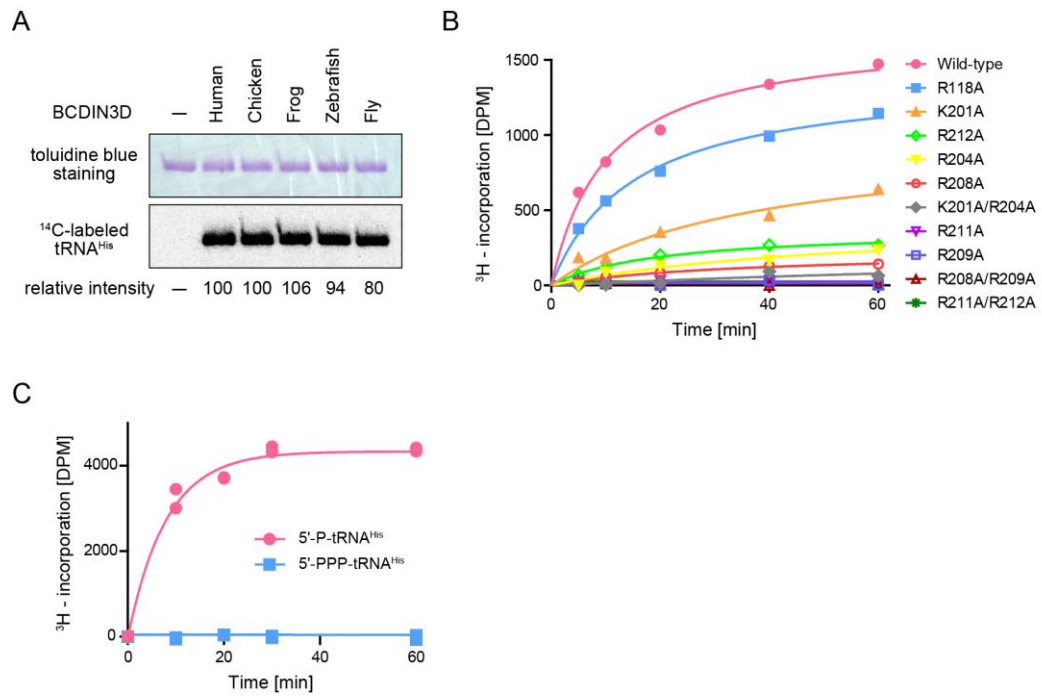

Figure S3

A

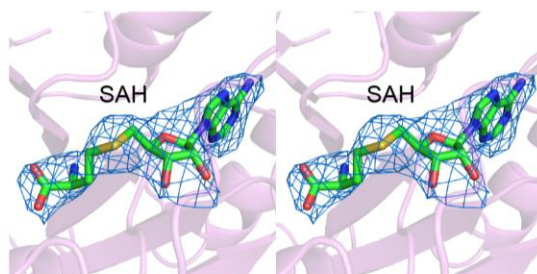

B

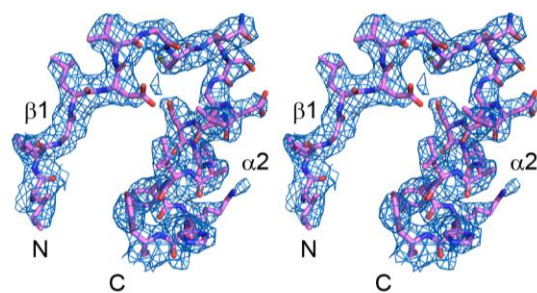

Figure S4

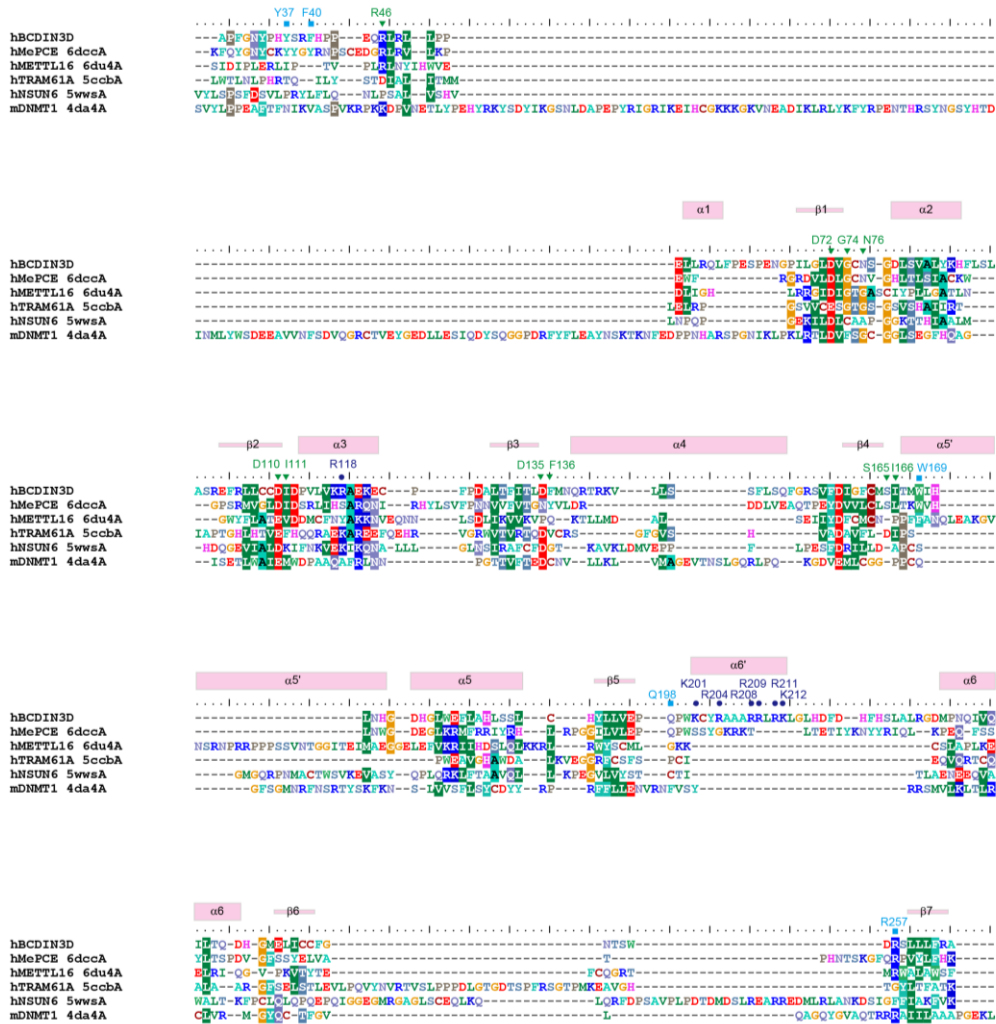

**Figure S5**

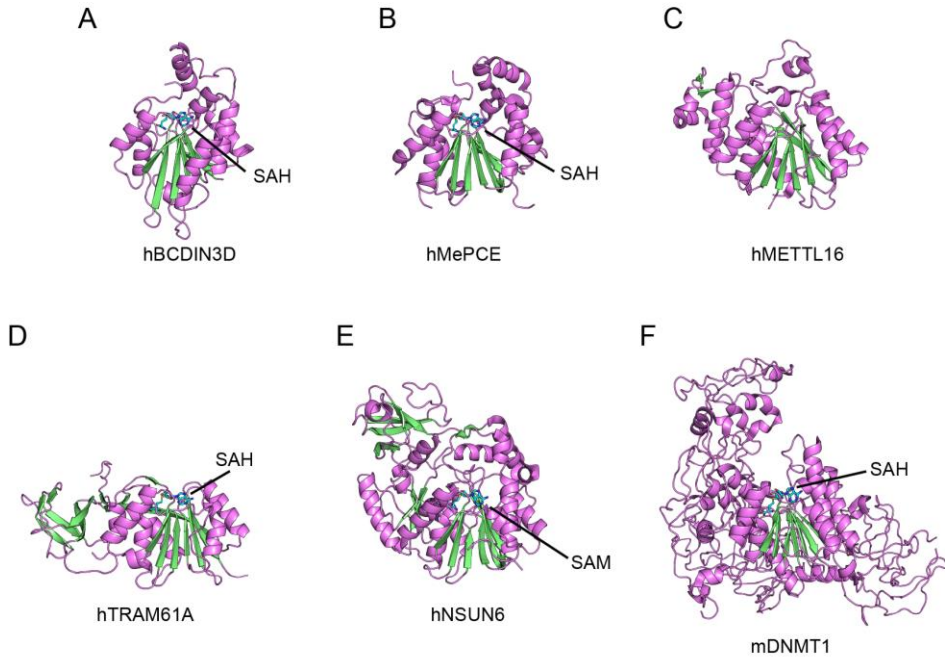

**Table S1: Nucleotide sequences of the synthetic BCDIN3D genes**

|                              |                                                                                                                                                                                                                                                                                                                                                                                                                                                                                                                                                                                                                                                                                                                                                                                                                                                                                                                                                                                                                                |
|------------------------------|--------------------------------------------------------------------------------------------------------------------------------------------------------------------------------------------------------------------------------------------------------------------------------------------------------------------------------------------------------------------------------------------------------------------------------------------------------------------------------------------------------------------------------------------------------------------------------------------------------------------------------------------------------------------------------------------------------------------------------------------------------------------------------------------------------------------------------------------------------------------------------------------------------------------------------------------------------------------------------------------------------------------------------|
| <p>human BCDIN3D gene</p>    | <p>ATGGCGGTTCCGACGGAACCTGGATGGCGGCTCCGTCAAGGAAACCGCTGC<br/> GGAAGAAGAATCGCGCGTATTGGCCCTGGTGCAGCACCATTGGCAACTT<br/> TCCGCACTATTTCGCGCTTCCATCCACCTGAACAGCGATTGCGCCTGTTACCG<br/> CCGGAATTGCTGCGTCAGTTGTTTTCCGGAGAGTCCGGAGAATGGTCCGATT<br/> CTGGGGCTCGATGTGGGGTGTAAACAGTGGAGACTTATCGGTGGCTCTGTAC<br/> AAACACTTTCTGTCACTGCCCGATGGTGAAGACATGCAGTGACGCCTCTCGG<br/> GAATTTTCGTCTGTTATGTTGCGATATCGATCCGGTTCTTGTTAAACGCGCGG<br/> AAAAGAGTGTCCGTTCCAGACGCGCTGACCTTTATCACTCTTGACTTCA<br/> TGAACCAACGCACCCGAAAGTGCTGCTCTCCTCCTTTCTGTCTCAGTTCG<br/> GTCGTTCTGTGTTTCGATATCGGTTTCTGTATGAGCATTACGATGTGGATTCAT<br/> CTGAATCATGGCGATCATGGTCTGTGGGAGTTTCTGGCCCATCTCAGCTCAC<br/> TTTGCCACTACCTGTTAGTCGAGCCACAACCGTGGAATGCTATCGTGCTGC<br/> AGCGAGACGTCTACGCAAACCTAGGCCTGCATGACTTTGACCACTTCACTC<br/> ACTGGCGATTTCGCGGAGATATGCCGAACCAGATCGTACAGATTCTGACCCA<br/> AGATCACGGCATGGAACCTGATCTGCTGCTTTGGGAATACTAGCTGGGATCGT<br/> AGCTTATTGCTTTTCCGTGCCAAACAGACCATTGAAACGCATCCCATTCTG<br/> AAAGCCTGATAGAAAAAGGCAAAGAAAAGAATCGCCTCAGCTTCCAAAAG<br/> CAGTAA</p> |
| <p>chicken BCDIN3D gene*</p> | <p>ATGGCAGCCCCGACCAACGAAGAAGATGCAGCACTGGAACCGGGTGCCGC<br/> ACCGTATGGCAACTTCCCGAACTATAGTCGTTTTTCATCCGCCGGAGGGTCGC<br/> TTACGTTTACTGCCTGGCGGTCTGCTGCGCCGTTTATTCCCGAGCGATGCC<br/> GCCCGTTACTGGGTCTGGATGTGGGTTGCAATAGCGGTGAGCTGAGCGTGG<br/> CCCTGTATCGTCACCTGTTAGGCCTGCAAGAAGGTAAAGGCAGTCCGGAAC<br/> AACCGGCCGACGGCAAAGATCTGCACCTGCTGTGCTGCGACATTGATCCGG<br/> TTCTGATTGAACGCGCCCAGAAAAGCAGCCGTTTCCGAATAGCATTAGCT<br/> TCGCCAACCTGGACATCATGGATAGCAGCAGCCGCGAACCGTTCCTGAGCA<br/> GCTACTTAAGCCGTTTGGCCGAGCACCTTCGACATTAGCTTCTGCATGAG<br/> CGTGACCATGTGGATTACCTGAATCATGGTGATCGCGGTCTGGTGGAATTT<br/> CTGGCCTTCTGAGCAGTCTGTGTCGTTATCTGCTGATCGAGCCTCAACCGT<br/> GGAAGTGCTATCGCGCCGAGCACGTCGCTGCGTAAACTGGGCCGCAATG<br/> ATTTGATCATTTCGCGAGCCTGGCCATCAATGGCGATATGGCAGAGCGCAT<br/> TACCCAGATTCTGACCCGTGACTGCGCTATGGAACCTGGTGTGCTGCTTTGGT<br/> ACCACCAGTTGGGATCGCAGCCTGCTGCTGTTAAGAGCAATGGCAGCAAT<br/> CATGAGGGCCGCGAACCCGAGCGAACAGCAATAA</p>                                                                                                 |
| <p>frog BCDIN3D gene</p>     | <p>ATGGAAGCACATGACGCCCATGTGAACAGCGAAGAAAGCGAAAACCCGGG<br/> TGCCGCCCCGTATGGTAATTTTATCAACTACTATACTTTCAACCCGCCGGAA<br/> AATCGTCTGAGTCTGATCCCGGAAGCCCTGTTACAAAATATTGGCTTTACCA<br/> GCGGCGATGGCGAACGCGTGCTGATGCTGGACGTTGGCTGCAACAGCGGC<br/> GATCTGAGCGTTGCCCTGTATAAACACCTGCTGAACAAAGAGGCCTGCACC<br/> AGCGATAGTCCGCGCCAGGAACCTGTATATGCTGGGCTTCGACCTGGATCAG<br/> GATTTAATCCTGCGTGCCAGACCAGCAACCCGTTTCCGCGAACAATCCAG<br/> TTCATTCCGCTGGACATCACCGATGATACAGAGAGCCGCGCCGTTTACAA<br/> GCCTTTCTGGGCAAATTCGGTTGTTCTCGCTTTCATCTGAGCACCTGCTTTG<br/> CCGTGACCATGTGGGTGCATCTGAATCATGGTGATGCCGCATTTCTGAGTCT<br/> GCTGAGCCGCCTGGCCAGCCATAGCGAATATCTGCTGCTGGAAGCACAGCC<br/> GTGGAAATGCTATCGCAGTGCAGCCCGTCGTTACGTAAACTGGGCCGAG<br/> CGACTTTGACCATTTCAAAGCACTGAAGATCCGCGGCGATATGGCCGCACA<br/> TGCACGCGAGCATCTGGAGAAGCAGTGTAGCATGGAACCTGGTGCAGTGCT<br/> TTGGCAACACCAGTTGGGACCGCAGCCTGCTGCTGTTTCGCCGCCAGTAA</p>                                                                                                                                         |

|                           |                                                                                                                                                                                                                                                                                                                                                                                                                                                                                                                                                                                                                                                                                                                                                                                                                                                              |
|---------------------------|--------------------------------------------------------------------------------------------------------------------------------------------------------------------------------------------------------------------------------------------------------------------------------------------------------------------------------------------------------------------------------------------------------------------------------------------------------------------------------------------------------------------------------------------------------------------------------------------------------------------------------------------------------------------------------------------------------------------------------------------------------------------------------------------------------------------------------------------------------------|
| zebrafish<br>BCDIN3D gene | ATGAGCAATAGCGAAAGCGTGCCGCACGTTGATCCTGGTGCAGCCCCGTAC<br>GGCAACTTCCCGAACTACTATAGCTTCAACCCGCCGGAAAACCGCATTAGC<br>CTGCTGCCGGCCGAACTGCTGCACAAGCTGTTCCGCAAACCGGCCGAGAG<br>CGATAGTAGCACCCAGCCGCTGCTGGGTTTAGATGTGGGCTGCAATACCGG<br>TGACCTGAGCGTTGCCCTGTACAACCATCTGACCGAACCTCACAGCAAGAG<br>CAGCGATGTTCCGGTGCACCTTTCTGTGCTGCGACATTGATCCGGACCTGATT<br>ACCCGTGCACGTGCCAGCAACCCTTTTCCGGACTTCATCAGCTACGCAACC<br>CTGGACATCATGGATAGCAGCGCCGTGCGTGGCCCCGGTGAATGACTTCTTA<br>CAACAGTTTGCCCGCAGCACCTTTGACATCGCCTTCTGCATGAGCGTGACC<br>ATGTGGATTATCTGAACTACGGCGATCAGGGCCTGGTGACCTTCTGGGT<br>CATCTGGCCAACCTGTGCGACTATCTGCTGGTGGAAACCGCAACCGTGGAAA<br>TGCTATCGTAGCGCAGCCCGTCGTCTGCGTAAACTGGGCCGTGAGGATTC<br>GATCACTTCCACAGCCTGAGCATTGCGGGCGACATGGCCGAGAACATCACC<br>CAGATCTTAACAGCCGAAGGCGCCGCCAAACTGATCCACATCTTTGGCAAC<br>ACCAGCTGGGACCGCAGCCTGCTGCTGTTTAAAATCCAGCGCCATCCGTGC<br>TAA |
| fly BCDIN3D gene          | ATGGATATTCGTAATAATGATCCGGGCGCCGTGCAATATGGCAATTTTTTCAA<br>CTATTACCAGTTTAGCAGCGCAGCCGAGCGCGTGAAGTTACTGCCGGATGC<br>CGATATTTGGCTGCCTGCCCTGGAGGACGGTGAGACCCAGAAAGATAAACC<br>GTATTTTATTCTGGATGTGGGTTGCAACTGCGGCGTTCTGACCCAGCTGATG<br>CACAAGTACCTGGAAGAACGTCTGCATCGCAGCGTGAAAGTGCTGGGCGT<br>TGACATTGATCCGCGCCTGATCCAACGCGCCAGCGAGGAAAACGAGAGCC<br>CGAAAGACGTGAGCTATGCCTGCGTGGACGTGCTGGATGATGAGGCCTTG<br>AAAGCGTGAAAACCTATATGGAAGTGAACAACCTGGAGAAGTTGACGCC<br>ATCTGCTGCTATAGCATCACCATGTGGATTCATCTGAATCATCATGATCAGGG<br>CCTGCGCTTCTTCTTACAAAAACTGAGCAACCTGGCCGAACTGCTGGTGGT<br>GGAACCGCAGCCGTGGAAATGCTATCAGAAAGCCGAGCGCCGCCTGAAAA<br>AAGCCGCGAAATCTTCCCGCTGTTTCTGGAAGTGAATGGCGCAGCGATG<br>TGGACTTACAAATCCAGAAATACCTGGAGGAGAGCCTGGACCGCCGCAA<br>ATCTTTAAGAGCGCCCCGACCAAGTGGCAGCGTAAAATCTGCTTTTATCGCT<br>AA                                                             |

\* The C-terminal residue of Chicken BCDIN3D (Q268) was omitted.

**Table S2: List of synthetic oligonucleotides**

|                                |                                   |
|--------------------------------|-----------------------------------|
| hBCDIN3D_fromE14_Fw_NdeI       | AGCTAGCTCATATGGAAACCGCTGCGGAAGAAG |
| hBCDIN3D_toK284_Rv_XhoI_nostop | AGCTCTCGAGCTTTTCTTTGCCTTTTCTATC   |
| bcdin3d-R118A-FW               | GCCGCGGAAAAAGAGTGTCCGTTCCCAGAC    |
| bcdin3d-R118A-RV               | TTTAACAAGAACCGGATCGATATCGCAAC     |
| bcdin3d-K201A-FW               | GCATGCTATCGTGCTGCAGCGAGACGTC      |
| bcdin3d-K201A-RV               | CCACGGTTGTGGCTCGACTAACAGGTAG      |
| bcdin3d-R204A-FW               | GCACCTGCAGCGAGACGTCTACGCAAAC      |
| bcdin3d-R204A-RV               | ATAGCATTTCACGGTTGTGGCTCGAC        |
| Double201-204-RV               | ATAGCATGCCACGGTTGTGGCTCGAC        |
| bcdin3d-R208A-FW               | GCACGTCTACGCAAACCTAGGCCTGCATGAC   |
| bcdin3d-R208A-RV               | CGCTGCAGCACGATAGCATTTCACGG        |
| bcdin3d-R209A-FW               | GCACTACGCAAACCTAGGCCTGCATGAC      |
| bcdin3d-R209A-RV               | TCTCGCTGCAGCACGATAGCATTTCAC       |
| Double208-209-RV               | TGCCGCTGCAGCACGATAGCATTTCAC       |
| bcdin3d-R211A-FW               | GCCAAACTAGGCCTGCATGACTTTGACCAC    |
| bcdin3d-R211A-RV               | TAGACGTCTCGCTGCAGCACGATAGC        |
| bcdin3d-K212A-FW               | GCACTAGGCCTGCATGACTTTGACCAC       |
| bcdin3d-K212A-RV               | GCGTAGACGTCTCGCTGCAGCACGATAG      |
| Double211-212-RV               | GGCTAGACGTCTCGCTGCAGCACGATAG      |
| bcdin3d-R257A-FW               | GCAAGCTTATTGCTTTTCCGTGCCACC       |
| bcdin3d-R257A-RV               | ATCCCAGCTAGTATTCCCAAAGCAGCAG      |
| 46_Rev                         | CTGTTTCAGGTGGATGGAAGCGGAATAGTG    |
| R46A_For                       | GCATTGCGCCTGTTACCGCCGGAATTGCTG    |
| 72-76 Rev                      | GAGCCCCAGAATCGGACCATTCTCCGG       |
| D72A For                       | GCTGTGGGGTGTAACAGTGGAGACTTATCG    |
| G74A_For                       | GATGTGGCGTGTAACAGTGGAGACTTATCG    |
| 72AG74A_For                    | GCTGTGGCGTGTAACAGTGGAGACTTATCG    |
| N76A_For                       | GATGTGGGGTGTGCCAGTGGAGACTTATCGGTG |
| 110-111_Rev                    | GCAACATAACAGACGAAATTCCCC          |
| D110A For                      | GCTATCGATCCGGTTCTTGTTAAACGCGCG    |
| I111G_For                      | GATGGCGATCCGGTTCTTGTTAAACGCGCG    |



|                       |                                     |
|-----------------------|-------------------------------------|
| 135-136_Rev           | AAGAGTGATAAAGGTCAGCGCGTC            |
| D135A_For             | GCCTTCATGAACCAACGCACCCGGAAAGTG      |
| F136G_For             | GACGGCATGAACCAACGCACCCGGAAAGTGCTG   |
| 165-166_Rev           | CATACAGAAACCGATATCGAACAC            |
| S165A_For             | GCCATTACGATGTGGATTCATCTGAATCATGGC   |
| I166G_For             | AGCGGTACGATGTGGATTCATCTGAATCATGGC   |
| hBCDIN3D_Y37A_m_Fw    | GCGTCGCGCTTCCATCCACCTGAACAGCGATTGC  |
| hBCDIN3D_Y37F_m_Fw    | TTTTCGCGCTTCCATCCACCTGAACAGCGATTGC  |
| hBCDIN3D_Y37F_Rv      | GTGCGGAAAGTTGCCAAATGGTGCTGCACCAGGG  |
| hBCDIN3D_R39F40A_m_Fw | CGCGCGCATCCACCTGAACAGCGATTGCGCCTG   |
| hBCDIN3D_R39F40A_Rv   | CGAATAGTGCGGAAAGTTGCCAAATGGTGCTGCAC |
| hBCDIN3D_W169F_m_Fw   | TTTATTCATCTGAATCATGGCGATCATGGTCTG   |
| hBCDIN3D_W169F_Rv     | CATCGTAATGCTCATACAGAAACCGATATCGAAC  |
| hBCDIN3D_Q198A_m_Fw   | GCGCCGTGGAAATGCTATCGTGCTGCAGCGAGACG |
| hBCDIN3D_Q198A_Rv     | TGGCTCGACTAACAGGTAGTGGCAAAGTGAGCTG  |

## Supplementary Figure Legends

### Supplementary Figure S1: Sequence alignments of BCDIN3Ds and MePCEs from various organisms.

Amino acid sequences of human BCDIN3D (HsBCDIN3D) and MePCE (HsMePCE) are aligned with those of BCDIN3D or MePCE from other organisms: *Gallus gallus*, *Xenopus laevis*, *Danio rerio*, and *Drosophila melanogaster*. Secondary structural elements of the human BCDIN3D (present study) and human MePCE (PDB ID: 6DCC) are depicted above and below the sequences, respectively. The  $\alpha$ -helices and  $\beta$ -sheets are shown as bars. tRNA<sup>His</sup>-interacting residues and SAM-interacting residues mutated in the biochemical assays are indicated.

### Supplementary Fig. 2: tRNA<sup>His</sup> methylation by the BCDIN3Ds.

(A) *In vitro* methylations of the human tRNA<sup>His</sup> transcript by BCDIN3D proteins from various organisms. tRNAs were separated by gel electrophoresis under denaturing conditions, and stained with toluidine blue (upper). <sup>14</sup>C-methylated tRNAs were detected with a BAS-5000 imager (lower), and the relative <sup>14</sup>C-band intensities were calculated. The intensity of <sup>14</sup>C-methylated tRNA by human BCDIN3D was designated as 100. (C) *In vitro* methylation assay of the human tRNA<sup>His</sup> transcript with 5'-triphosphate (ppp-tRNA<sup>His</sup>). ppp-tRNA<sup>His</sup> cannot be methylated by BCDIN3D.

### Supplementary Fig. 3: Representative images of electron densities.

2Fo-Fc electron density contoured at 1.0  $\sigma$  around (A) the SAH molecule and (B) residues corresponding to the  $\beta$ 1-strand and  $\alpha$ 2-helix (residues I68-F88).

### Supplementary Fig. 4: Sequence alignments of the Rossmann fold family methyltransferases.

The amino acid sequences of human BCDIN3D (hBCDIN3D) and human MePCE (hMePCE, PDB ID: 6DCC), human METTL16 (hMETTL16, PDB ID: 6DU4), human TRAM61A (hTRAM61A, PDB ID: 5CCB), human NSUN6 (hNSUN6, PDB ID: 5WWS), and mouse DNMT1 (mDNMT1,

PDB ID: 4DA4) are aligned. Secondary structural elements of hBCDIN3D are depicted above the sequences. The  $\alpha$ -helices and  $\beta$ -strands are shown as bars. tRNA<sup>His</sup>-interacting residues and SAM-interacting residues mutated in the biochemical assays are indicated by blue circles and green triangles, respectively.

**Supplementary Fig. 5: Structures of Rossmann fold family methyltransferases.**

(A) - (F) Structures of (A) human BCDIN3D, (B) human MePCE (PDB ID: 6DCC), (C) human METTL16 (PDB ID: 6DU4), (D) human TRAM61A (PDB ID: 5CCB), (E) human NSUN6 (PDB ID: 5EES), and (F) mouse DNMT1 (PDB ID: 4DA4).

**Supplementary Table S1: Nucleotide sequences of synthetic BCDIN3D genes.**

**Supplementary Table S2: List of synthetic oligonucleotides.**
